# Supplementary material
Source: PubMed Central journal article supplement (PMC7116087)
Supplement: EMS94847-supplement-Supplementary_information__.pdf [file EMS94847-supplement-Supplementary_information__.pdf]

## Supplementary Appendix

This appendix has been provided by the authors to give readers additional information about their work.

Supplement to: Fazel S, Runeson B. Suicide. *N Engl J Med* 2020;382:266-74. DOI: 10.1056/NEJMra1902944

## **Supplemental appendix**

### **Suicide risk in specific populations**

|                                                                                      |            |
|--------------------------------------------------------------------------------------|------------|
| <i>Adolescents</i>                                                                   | <i>p.1</i> |
| <i>Older adults</i>                                                                  | <i>p.1</i> |
| <i>Primary care</i>                                                                  | <i>p.2</i> |
| <i>Recently discharged psychiatric patients and individuals who have self-harmed</i> | <i>p.3</i> |
| <i>Prisoners</i>                                                                     | <i>p.4</i> |
| <i>Military and veteran populations</i>                                              | <i>p.4</i> |
| <i>Nonheterosexuals</i>                                                              | <i>p.5</i> |
| <i>References</i>                                                                    | <i>p.5</i> |

### *Adolescents*

While most other causes of death are declining in children and adolescents in the US, injuries and suicide are increasing.<sup>1</sup> Between 2013 and 2016, there was 26% increase in rates of firearm suicide<sup>1</sup> and 12% risk for other suicide methods. Increased risk-taking behavior, differential peer and parental influence, and initiation of substance use during adolescence may explain these rises.<sup>2</sup> In younger people, negative life events, mental disorders, drug problems, family history of suicidal behaviors, externalizing disorders, access to means, and previous self-harm are associated with completed suicide.<sup>3 4</sup> Treatment research is limited. Evidence exists for mentalization-based treatment in reducing self-harm in girls.<sup>5</sup> Other psychological treatments have shown potential for reducing suicidal behavior but require replication, identification of active treatment ingredients, and examination of effect mediators.<sup>6</sup>

### *Older adults*

Older adult men aged over 64 have high suicide risk combined with low healthcare uptake.<sup>7</sup> The combination of poor physical health and difficulties in identifying psychiatric disorders in primary and somatic care are obstacles. In a large US survey, 83% of older adults received healthcare in the year prior to their suicide, but half were not diagnosed with psychiatric disorders.<sup>8</sup> Risk factors for suicide in older people include functional disability and specific physical conditions, including malignant diseases, neurological disorders, male genital disorders, arthritis/arthrosis, and COPD.<sup>9</sup> High suicide rates are reported within three years of diagnosis for gastrointestinal cancer in men, brain cancer in women, and liver diseases in both genders.<sup>10</sup> Social isolation is important, losses of role and status, and most older persons who commit suicide are widowed. However, less than a fifth of the oldest old (80+) who die from suicide have recently lost a partner.<sup>11</sup> Intervention research has relied on quasi-experimental designs investigating the introduction of multifaceted program of psychoeducation, depression screening, training, group therapy and clearer referral pathways in Japanese women, particularly in rural areas.<sup>12</sup> Telephone counselling has been associated with reduced suicide rates in three cohort studies.<sup>13</sup> Trials of collaborative care models (where depression care managers collaborate with physicians) have used suicidal behavior outcomes and reported absolute rate reductions.<sup>13</sup> Thus clinical guidelines suggest optimizing the management of late life depression in healthcare settings.<sup>14</sup> Better understanding of losses

important to older men, and problems with bodily functions (e.g., eyes, mobility) may improve risk assessment.

### *Primary care*

Contact with primary health care prior to suicide is common, including nearly half who died in the month before death.<sup>15</sup> However, no interventions in primary care have been linked to improved outcomes. Screening for depression and suicidal ideation,<sup>16</sup> improved training of primary care physicians<sup>17</sup> are not associated with reduced suicides. Most patients with mental illness are treated in primary care, and depressed persons should be asked about suicidality with urgent referral and treatment if suicidal thoughts escalate.<sup>18</sup>

### *Recently discharged psychiatric patients and individuals who have self-harmed*

It has been estimated that 57% of those who die from suicide have had some contact with psychiatric services in their lifetimes, and 31% in the last 12 months.<sup>15</sup> Suicide risk is substantially elevated within three months of discharge from psychiatric hospital.<sup>19</sup> Markers strongly associated with post-discharge suicide are depressive symptoms, an unplanned discharge, and recent social difficulties.<sup>20</sup> Hazards were elevated at least five-fold for depression, bipolar disorder, schizophrenia and substance use disorder in a large US study.<sup>21</sup> The contribution of previous self-harm differs by setting, diagnosis and method. A recent Swedish population study of 2.9 million discharged patients reported suicide risk elevated in discharged patients who had self-harmed within four weeks of admission.<sup>22</sup> In those with recent self-harm episode, the highest risks of suicide were in patients diagnosed with schizophrenia-spectrum disorders. A violent method for the index self-harm, especially firearms, substantially increased hazards,<sup>23</sup> and other violent methods such as hanging and self-cutting increase suicide risks compared to non-violent methods where firearm deaths are rare.<sup>24,25</sup>

Intervention work finds reduced repetition of self-harm after 6 and 12 months following cognitive-behavioural psychological treatment.<sup>26</sup> Other treatments after self-harm such as dialectical behavioural therapy, case management, sending regular postcards and pharmacotherapy have found no consistent reductions in self harm or suicide.<sup>27</sup> A recent large

US trial showed that simple interventions targeted at high risk groups identified by screening led to a 20% reduction in suicidal behaviors over 12 months.<sup>28</sup> Brief interpersonal interventions show promise but require independent replication.<sup>29</sup> Observational evidence triangulates these findings, and finds that 8-10 psychosocial outpatient treatments after self-harm prevents later suicide with a 3% absolute rate difference.<sup>30</sup>

### *Prisoners*

Prisoners have higher rates of suicide than community-based persons of similar age and gender. During 2011-2014, the suicide rate was 23 per 100,000 persons in all US jails and prisons, which was higher in local jails and in men (where it was 45/100,000 male prisoners, and 30/100,000 female prisoners).<sup>31</sup> In some European countries, suicide rates were more than 100 per 100,000 prisoners, including Norway, France, and Finland. This translates into elevated relative risks of 3 to 6 fold in men, with greater excesses in women. However, suicide rates are higher than in men. Risk factors are similar to those in the general population, and include psychiatric diagnoses and alcohol use disorders. Prison-specific factors include single cell occupancy, being on remand, life sentence, and violent offense conviction.<sup>32</sup> Lower incarceration is associated with decreased suicide rates, which may be explained by individuals with less serious offenses importing fewer risk factors.<sup>31</sup> Near-lethal studies have reported additional risk factors including depressive disorders, comorbidity, prior prison sentences, and lower perceptions of social support.<sup>33</sup> Evidence on effective intervention are limited. Improved mental health treatment, and in particular linking health screening to interventions, lowers prisoner self-harm. Promoting safer environments, including the removal of ligature points, may reduce suicide rates.<sup>34</sup>

### *Military and veteran populations*

The military have historically been healthier than general populations as they are screened before entry, tend to be young and active, and provided with accessible medical care. Consequently, suicide rates were lower than the community<sup>35 36</sup> apart from recent US data suggesting higher military rates from 2008.<sup>37</sup> All US veterans are now at higher suicide risk than the general population,<sup>38</sup> and those in active service had suicide rates in 2015 of 20 per 100,000 persons, unchanged from 2012-2014.<sup>39</sup> Risk factors for veteran suicides include

early separation from service,<sup>35</sup> recent deployment,<sup>40</sup> lower rank and younger age.<sup>36</sup> More junior enlisted soldiers are at elevated risk, and that clinical depression and multimorbidity are risk factors.<sup>41</sup> Beyond providing high quality psychiatric care and reducing stigma to accessing such treatment, there is little intervention evidence. One brief intervention, Safety Planning Intervention (SPI) for male veterans, which involves prioritising coping strategies with telephone contact to monitor suicide risk, was associated with a reduction in suicidal behaviour during follow-up.<sup>42</sup>

### *Nonheterosexuals*

No clear associations have been found between nonheterosexuality and suicide.<sup>43</sup> Lesbian, gay and bisexual (LGB) adolescents have a two-fold elevated risk of suicide attempts than their heterosexual peers,<sup>43</sup> which may be explained by higher rates of victimization and substance use.<sup>44</sup> Suicidality risks are high in bisexual women.<sup>45</sup> Clinicians working with nonheterosexuals should discuss openly suicidality, and consider reducing internalised stigma.<sup>45</sup>

### **References**

1. Cunningham RM, Walton MA, Carter PM. The major causes of death in children and adolescents in the United States. *N Engl J Med* 2018;379:2468-75.
2. Arnett JJ. Adolescent storm and stress, reconsidered. *Am Psychol* 1999;54:317.
3. Miranda-Mendizabal A, Castellví P, Parés-Badell O, et al. Gender differences in suicidal behavior in adolescents and young adults: systematic review and meta-analysis of longitudinal studies. *Int J Public Health* 2019:1-19.
4. Olfson M, Wall M, Wang S, et al. Suicide after deliberate self-harm in adolescents and young adults. *Pediatrics* 2018;141:e20173517.
5. Rossouw TI, Fonagy P. Mentalization-based treatment for self-harm in adolescents: a randomized controlled trial. *J Am Acad Child Adolesc Psychiatry* 2012;51:1304-13.e3.
6. Glenn CR, Franklin JC, Nock MK. Evidence-based psychosocial treatments for self-injurious thoughts and behaviors in youth. *J Clin Child Adolesc Psychol* 2015;44:1-29.
7. Ahmedani BK, Simon GE, Stewart C, et al. Health care contacts in the year before suicide death. *J Gen Intern Med* 2014;29:870-7.
8. De Leo D, Arnautovska U. Prevention and treatment of suicidality in older adults. *The international handbook of suicide prevention* 2016:323-45.
9. Fässberg MM, Cheung G, Canetto SS, et al. A systematic review of physical illness, functional disability, and suicidal behaviour among older adults. *J Ment Health Aging* 2016;20:166-94.

10. Erlangsen A, Stenager E, Conwell Y. Physical diseases as predictors of suicide in older adults: a nationwide, register-based cohort study. *Soc Psychiatry Psychiatr Epidemiol* 2015;50:1427-39.
11. Erlangsen A, Jeune B, Bille-Brahe U, Vaupel JW. Loss of partner and suicide risks among oldest old: a population-based register study. *Age Ageing* 2004;33:378-83.
12. Oyama H, Sakashita T. Community-based screening intervention for depression affects suicide rates among middle-aged Japanese adults. *Psychol Med* 2017;47:1500-9.
13. Okolie C, Dennis M, Simon Thomas E, John A. A systematic review of interventions to prevent suicidal behaviors and reduce suicidal ideation in older people. *Int Psychogeriatr* 2017;29:1801-24.
14. Erlangsen A, Nordentoft M, Conwell Y, et al. Key considerations for preventing suicide in older adults. *Crisis* 2011;32:106-9.
15. Stene-Larsen K, Reneflot A. Contact with primary and mental health care prior to suicide: a systematic review of the literature from 2000 to 2017. *Scand J Public Health* 2017;1403494817746274.
16. O'Connor E, Gaynes BN, Burda BU, Soh C, Whitlock EP. Screening for and treatment of suicide risk relevant to primary care: a systematic review for the U.S. Preventive Services Task Force. *Ann Intern Med* 2013;158:741-54.
17. Alexopoulos GS, Reynolds CF, Bruce ML, et al. Reducing suicidal ideation and depression in older primary care patients: 24-month outcomes of the PROSPECT Study. *Am J Psychiatry* 2009;166:882-90.
18. Park LT, Zarate CA. Depression in the primary care setting. *N Engl J Med* 2019;380:559-68.
19. Chung DT, Ryan CJ, Hadzi-Pavlovic D, Singh SP, Stanton C, Large MM. Suicide rates after discharge from psychiatric facilities: a systematic review and meta-analysis. *JAMA Psychiatry* 2017;74:694-702.
20. Large M, Sharma S, Cannon E, Ryan C, Nielssen O. Risk factors for suicide within a year of discharge from psychiatric hospital: a systematic meta-analysis. *Aust N Z J Psychiatry* 2011;45:619-28.
21. Olfson M. Suicide risk after psychiatric hospital discharge. *JAMA Psychiatry* 2017;74:669-70.
22. Haglund A, Lysell H, Larsson H, Lichtenstein P, Runeson B. Suicide immediately after discharge from psychiatric inpatient care: a cohort study of nearly 2.9 million discharges. *J Clin Psychiatry* 2019;80.
23. Olfson M, Wall M, Wang S, Crystal S, Gerhard T, Blanco C. Suicide following deliberate self-harm. *Am J Psychiatry* 2017;174:765-74.
24. Runeson B, Haglund A, Lichtenstein P, Tidemalm D. Suicide risk after nonfatal self-harm: a national cohort study, 2000–2008. *J Clin Psychiatry* 2016;77:240-6.
25. Runeson B, Tidemalm D, Dahlin M, Lichtenstein P, Långström N. Method of attempted suicide as predictor of subsequent successful suicide: national long term cohort study. *BMJ* 2010;341:c3222.
26. Hawton K, Witt KG, Salisbury TLT, et al. Psychosocial interventions following self-harm in adults: a systematic review and meta-analysis. *Lancet Psychiatry* 2016;3:740-50.
27. Hawton K, Witt KG, Salisbury TLT, et al. Pharmacological interventions for self-harm in adults. *Cochrane Database Syst Rev* 2015.
28. Miller IW, Camargo CA, Jr., Arias SA, et al. Suicide prevention in an emergency department population: the ED-SAFE Study. *JAMA Psychiatry* 2017;74:563-70.
29. Gysin-Maillart A, Schwab S, Soravia L, Megert M, Michel K. A novel brief therapy for patients who attempt suicide: a 24-months follow-up randomized controlled study of the attempted suicide short intervention program (ASSIP). *PLoS Medicine* 2016;13:e1001968.

30. Erlangsen A, Lind BD, Stuart EA, et al. Short-term and long-term effects of psychosocial therapy for people after deliberate self-harm: a register-based, nationwide multicentre study using propensity score matching. *Lancet Psychiatry* 2015;2:49-58.
31. Fazel S, Ramesh T, Hawton K. Suicide in prisons: an international study of prevalence and contributory factors. *Lancet Psychiatry* 2017;4:946-52.
32. Fazel S, Cartwright J, Norman-Nott A, Hawton K. Suicide in prisoners: a systematic review of risk factors. *J Clin Psychiatry* 2008;69:1721-31.
33. Marzano L, Hawton K, Rivlin A, Smith EN, Piper M, Fazel S. Prevention of suicidal behavior in prisons. *Crisis* 2016.
34. Gunnell D, Bennewith O, Hawton K, Simkin S, Kapur N. The epidemiology and prevention of suicide by hanging: a systematic review. *Int J Epidemiol* 2005;34:433-42.
35. Reger MA, Smolenski DJ, Skopp NA, et al. Risk of suicide among US military service members following Operation Enduring Freedom or Operation Iraqi Freedom deployment and separation from the US military. *JAMA Psychiatry* 2015;72:561-9.
36. Kapur N, While D, Blatchley N, Bray I, Harrison K. Suicide after leaving the UK armed forces—a cohort study. *PLoS Med* 2009;6:e1000026.
37. Reger MA, Smolenski DJ, Skopp NA, et al. Suicides, homicides, accidents, and undetermined deaths in the US military: comparisons to the US population and by military separation status. *Ann Epidemiol* 2018;28:139-46. e1.
38. Kang HK, Bullman TA, Smolenski DJ, Skopp NA, Gahm GA, Reger MA. Suicide risk among 1.3 million veterans who were on active duty during the Iraq and Afghanistan wars. *Ann Epidemiol* 2015;25:96-100.
39. Reger MA, Pruitt LD, Smolenski DJ. Lessons from the latest US Military Suicide Surveillance Data. *J Clin Psychiatry* 2018;79.
40. Shen Y-C, Cunha JM, Williams TV. Time-varying associations of suicide with deployments, mental health conditions, and stressful life events among current and former US military personnel: a retrospective multivariate analysis. *Lancet Psychiatry* 2016;3:1039-48.
41. Naifeh JA, Mash HBH, Stein MB, Fullerton CS, Kessler RC, Ursano RJ. The Army Study to assess risk and resilience in servicemembers (Army STARRS): progress toward understanding suicide among soldiers. *Mol Psychiatry* 2019;24:34-48.
42. Stanley B, Brown GK, Brenner LA, et al. Comparison of the safety planning intervention with follow-up vs usual care of suicidal patients treated in the emergency department. *JAMA Psychiatry* 2018;75:894-900.
43. Miranda-Mendizábal A, Castellví P, Parés-Badell O, et al. Sexual orientation and suicidal behaviour in adolescents and young adults: systematic review and meta-analysis. *Br J Psychiatry* 2017;211:77-87.
44. Johns MM, Lowry R, Rasberry CN, et al. Violence victimization, substance use, and suicide risk among sexual minority high school students—United States, 2015–2017. *Morb Mortal Wkly Rep* 2018;67:1211.
45. Swannell S, Martin G, Page A. Suicidal ideation, suicide attempts and non-suicidal self-injury among lesbian, gay, bisexual and heterosexual adults: findings from an Australian national study. *Aust N Z J Psychiatry* 2016;50:145-53.
